# Supplementary material
Source: publisher figshare collection journal article supplement (https://gsapubs.figshare.com/ndownloader/files/38176035)
Supplement: Supplementary file 1 [file 38176035]

## Sheet: Sheet1
Input Thermochronological Data (c.f. with published data table)
Model Run Name	Single AHe Grains Small AHe Error (1%)				Single AHe Grains Large AHe Error (11%)				All AHe Grains Small AHe Error (1%)	All AHe Grains Large AHe Error (11%)	AFT Only	AFT and AHe data	AFT and AHe data Changing Prior	AFT and AHe data Changing Initial Constraint (i)	AFT and AHe data Changing Initial Constraint (ii)	AFT and AHe data Changing Initial Constraint (iii)	AFT and AHe data Resampling AHe Age Error	AFT and AHe data Resampling Observed AHe age	AFT and AHe data Changing RDAAM (i)	AFT and AHe data Changing RDAAM (ii)	AFT and AHe data Changing RDAAM (iii)
Sample Name	NQ12-09-1	NQ12-09-2	NQ12-09-3	NQ12-09-4	NQ12-09-1	NQ12-09-2	NQ12-09-3	NQ12-09-4	NQ12-09	NQ12-09	NQ12-09	NQ12-09	NQ12-09	NQ12-09	NQ12-09	NQ12-09	NQ12-09	NQ12-09	NQ12-09	NQ12-09	NQ12-09
Individual/multi-sample/profile model	Individual sample				Individual sample				Individual sample	Individual sample	Individual sample	Individual sample	Individual sample	Individual sample	Individual sample	Individual sample	Individual sample	Individual sample	Individual sample	Individual sample	Individual sample
(e.g.) AFT Data	No				No				No	No	yes	yes	yes	yes	yes	yes	yes	yes	yes	yes	yes
# Single Grains Counted	-				-				-	-	20	20	20	20	20	20	20	20	20	20	20
#Track Lengths	-				-				-	-	101	101	101	101	101	101	101	101	101	101	101
Comment (Horizontal confined/confined/semi-tracks)	-				-				-	-	HCT	HCT	HCT	HCT	HCT	HCT	HCT	HCT	HCT	HCT	HCT
Compositional proxy	-				-				-	-	yes	yes	yes	yes	yes	yes	yes	yes	yes	yes	yes
Comment (Dpar/Cl wt%/Rmr0 etc)	-				-				-	-	Dpar	Dpar	Dpar	Dpar	Dpar	Dpar	Dpar	Dpar	Dpar	Dpar	Dpar
(e.g.) Apatite (U-Th)/He (#)	yes	yes	yes	yes	yes	yes	yes	yes	yes	yes	No	yes	yes	yes	yes	yes	yes	yes	yes	yes	yes
# Single Grains	1	1	1	1	1	1	1	1	4	4	-	4	4	4	4	4	4	4	4	4	4
(e.g.) Zircon (U-Th)/He (#)	No				No				No	No	No	No	No	No	No	No	No	No	No	No	No
# Single Grains	-				-				-	-	-	-	-	-	-	-	-	-	-	-	-
General ranges for prior, additional constraints, temperature offset
General prior range
Time (Ma)	70.3 ± 70.3	73.9 ± 73.9	132.9 ± 132.9	108.4 ± 108.4	70.3 ± 70.3	73.9 ± 73.9	132.9 ± 132.9	108.4 ± 108.4	132.9 ± 132.9	132.9 ± 132.9	106.6 ± 106.6	132.9 ± 132.9	500 ± 500	132.9 ± 132.9	132.9 ± 132.9	132.9 ± 132.9	132.9 ± 132.9	132.9 ± 132.9	132.9 ± 132.9	132.9 ± 132.9	132.9 ± 132.9
Temperature (°C)	70±70				70±70				70 ± 70	70 ± 70	70 ± 70	70 ± 70	100 ± 100	70 ± 70	70 ± 70	70 ± 70	70 ± 70	70 ± 70	70 ± 70	70 ± 70	70 ± 70
Comment	AHe age ± AHe age, default prior on Temp covering range of PAZ and PRZ.				AHe age ± AHe age, default prior on Temp covering range of PAZ and PRZ.				Oldest AHe age ± Oldest AHe age, default prior on Temp covering range of PAZ and PRZ.	Oldest AHe age ± Oldest AHe age, default prior on Temp covering range of PAZ and PRZ.	AHe age ± AHe age, default prior on Temp covering range of PAZ and PRZ.	Oldest AHe age ± Oldest AHe age, default prior on Temp covering range of PAZ and PRZ.	Larger prior to encompass intitial post-crystalisation cooling of rock.	Oldest AHe age ± Oldest AHe age, default prior on Temp covering range of PAZ and PRZ.	Oldest AHe age ± Oldest AHe age, default prior on Temp covering range of PAZ and PRZ.	Oldest AHe age ± Oldest AHe age, default prior on Temp covering range of PAZ and PRZ.	Oldest AHe age ± Oldest AHe age, default prior on Temp covering range of PAZ and PRZ.	Oldest AHe age ± Oldest AHe age, default prior on Temp covering range of PAZ and PRZ.	Oldest AHe age ± Oldest AHe age, default prior on Temp covering range of PAZ and PRZ.	Oldest AHe age ± Oldest AHe age, default prior on Temp covering range of PAZ and PRZ.	Oldest AHe age ± Oldest AHe age, default prior on Temp covering range of PAZ and PRZ.
Constraint #1
Time (Ma)	-				-				-	-	-	-	-	355 ± 5	180 ± 5	1000 ± 100	-	-	-	-	-
Temperature (°C)	-				-				-	-	-	-	-	20 ± 10	20 ± 10	1000 ± 100	-	-	-	-	-
Comment	-				-				-	-	-	-	-	Pre-depostion of the Permo-triassic Karoo Supergroup	Pre-depostion of the Jurassic Karoo volcanics	Rock formation	-	-	-	-	-
Constraint #2
Time (Ma)	-				-				-	-	-	-	-	-	-	-	-	-	-	-	-
Temperature (°C)	-				-				-	-	-	-	-	-	-	-	-	-	-	-	-
Comment	-				-				-	-	-	-	-	-	-	-	-	-	-	-	-
Constraint #N
Time (Ma)	-				-				-	-	-	-	-	-	-	-	-	-	-	-	-
Temperature (°C)	-				-				-	-	-	-	-	-	-	-	-	-	-	-	-
Comment	-				-				-	-	-	-	-	-	-	-	-	-	-	-	-
Temperature offset of profile samples
Palaeo-temperature offset (°C)/Geothermal gradient (°C/km)	-				-				-	-	-	-	-	-	-	-	-	-	-	-	-
Present-day temperature offset (°C)/Geothermal gradient (°C/km)	-				-				-	-	-	-	-	-	-	-	-	-	-	-	-
Offset allowed to vary over time?	-				-				-	-	-	-	-	-	-	-	-	-	-	-	-
System-and model-specific parameters
Modelling software (and version)	QTQt (Version 5.7.1) (Gallagher, 2012)
FT annealing model
FT annealing model	-				-				-	-	Ketcham et al. (2007) multi-kinetic annealing model	Ketcham et al. (2007) multi-kinetic annealing model	Ketcham et al. (2007) multi-kinetic annealing model	Ketcham et al. (2007) multi-kinetic annealing model	Ketcham et al. (2007) multi-kinetic annealing model	Ketcham et al. (2007) multi-kinetic annealing model	Ketcham et al. (2007) multi-kinetic annealing model	Ketcham et al. (2007) multi-kinetic annealing model	Ketcham et al. (2007) multi-kinetic annealing model	Ketcham et al. (2007) multi-kinetic annealing model	Ketcham et al. (2007) multi-kinetic annealing model
C-axis projection	-				-				-	-	Yes	Yes	Yes	Yes	Yes	Yes	Yes	Yes	Yes	Yes	Yes
Compositional parameter	-				-				-	-	Yes (Dpar)	Yes (Dpar)	Yes (Dpar)	Yes (Dpar)	Yes (Dpar)	Yes (Dpar)	Yes (Dpar)	Yes (Dpar)	Yes (Dpar)	Yes (Dpar)	Yes (Dpar)
Etchant	-				-				-	-	5.5 M (Donelick et al., 2005)	5.5 M (Donelick et al., 2005)	5.5 M (Donelick et al., 2005)	5.5 M (Donelick et al., 2005)	5.5 M (Donelick et al., 2005)	5.5 M (Donelick et al., 2005)	5.5 M (Donelick et al., 2005)	5.5 M (Donelick et al., 2005)	5.5 M (Donelick et al., 2005)	5.5 M (Donelick et al., 2005)	5.5 M (Donelick et al., 2005)
Apatite He Kinetic Model
Radiation Damage	Flowers et al. (2009)				Flowers et al. (2009)				Flowers et al. (2009)	Flowers et al. (2009)	-	Flowers et al. (2009)	Flowers et al. (2009)	Flowers et al. (2009)	Flowers et al. (2009)	Flowers et al. (2009)	Flowers et al. (2009)	Flowers et al. (2009)	Gautheron et al. (2009)	Gerin et al. (2018)	Gerin et al. (2018)
comments on RD model used	-				-				-	-	-	-	-	-	-	-	-	-	-	D0 = 3x10-7 m2/s, Ea = 100 kJ/mol, Δ50 kJ/mol	D0 = 3x10-7 m2/s, Ea = 100 kJ/mol, Δ70 kJ/mol
Additional parameters	-				-				-	-	-	-	-	-	-	-	-	-	-	-	-
Alpha-ejection	input ages uncorrected, Ft correction applied after Meesters and Dunai, (2002)				input ages uncorrected, Ft correction applied after Meesters and Dunai, (2002)				input ages uncorrected, Ft correction applied after Meesters and Dunai, (2002)	input ages uncorrected, Ft correction applied after Meesters and Dunai, (2002)	-	input ages uncorrected, Ft correction applied after Meesters and Dunai, (2002)	input ages uncorrected, Ft correction applied after Meesters and Dunai, (2002)	input ages uncorrected, Ft correction applied after Meesters and Dunai, (2002)	input ages uncorrected, Ft correction applied after Meesters and Dunai, (2002)	input ages uncorrected, Ft correction applied after Meesters and Dunai, (2002)	input ages uncorrected, Ft correction applied after Meesters and Dunai, (2002)	input ages uncorrected, Ft correction applied after Meesters and Dunai, (2002)	input ages uncorrected, Ft correction applied after Meesters and Dunai, (2002)	input ages uncorrected, Ft correction applied after Meesters and Dunai, (2002)	input ages uncorrected, Ft correction applied after Meesters and Dunai, (2002)
Resampling of data?	-				-				-	-	-	-	-	-	-	-	Resampling of error on observed AHe ages.	Resampling of of observed AHe ages.	-	-	-
Zircon He Kinetic Model
Radiation Damage	-				-				-	-	-	-	-	-	-	-	-	-	-	-	-
comments on RD model used	-				-				-	-	-	-	-	-	-	-	-	-	-	-	-
Additional parameters	-				-				-	-	-	-	-	-	-	-	-	-	-	-	-
Alpha-ejection	-				-				-	-	-	-	-	-	-	-	-	-	-	-	-
Resampling of data?	-				-				-	-	-	-	-	-	-	-	-	-	-	-	-
# Iterations§
Burn in	50,000+				50,000+				50,000+	50,000+	50,000+	50,000+	50,000+	50,000+	50,000+	50,000+	50,000+	50,000+	50,000+	50,000+	50,000+
Post-Burn in	250,000+				250,000+				250,000+	250,000+	250,000+	250,000+	250,000+	250,000+	250,000+	250,000+	250,000+	250,000+	250,000+	250,000+	250,000+
Comments
MCMC parameters
Acceptance Rates
time & temperature	0.3189 & 0.58623	0.17098 & 0.54878	0.48082 & 0.52559	0.17971 & 0.53278	0.54658 & 0.63529	0.53723 & 0.60965	0.52417 & 0.68635	0.48336 & 0.69141	0.25885 & 0.46460	0.38156 & 0.63107	0.31440 & 0.54302	0.32625 & 0.54680	0.34741 & 0.52482	0.30208 & 0.49144	0.32159 & 0.53229	0.35035 & 0.52613	0.30465 & 0.54530	0.30168 & 0.54415	0.33408 & 0.58040	0.33691 & 0.56022.	0.31198 & 0.51515
annealing											0.60338	0.50867	0.51841	0.59164	0.59851	0.49136	0.50995	0.51264	0.54145	0.51607	0.58943
diffusion																	0.61483	0.5639
birth & death	0.02162 & 0.09501	0.01791 & 0.06892	0.29297 & 0.35055	0.01698 & 0.07081	0.02831 & 0.38828	0.03667 & 0.33765	0.04082 & 0.33201	0.03934 & 0.33658	0.00972 & 0.00971	0.02607 & 0.19534	0.03026 & 0.03234	0.02768 & 0.02803	0.08224 & 0.08312	0.02470 & 0.02471	0.02479 & 0.02513	0.02421 & 0.02453	0.02509 & 0.02564	0.02624 & 0.02641	0.0415 & 0.04168	0.04178 & 0.04213	0.03225 & 0.03733
Comments
	convergence of likelihood chains,				convergence of likelihood chains,				convergence of likelihood chains,	convergence of likelihood chains,	convergence of likelihood chains,	convergence of likelihood chains,	convergence of likelihood chains,	convergence of likelihood chains,	convergence of likelihood chains,	convergence of likelihood chains,	convergence of likelihood chains,	convergence of likelihood chains,	convergence of likelihood chains,	convergence of likelihood chains,	convergence of likelihood chains,
Data fit assessment	visual plot inspection of obs. vs. pred. ages				visual plot inspection of obs. vs. pred. ages				visual plot inspection of obs. vs. pred. ages	visual plot inspection of obs. vs. pred. ages	visual plot inspection of obs. vs. pred. ages	visual plot inspection of obs. vs. pred. ages	visual plot inspection of obs. vs. pred. ages	visual plot inspection of obs. vs. pred. ages	visual plot inspection of obs. vs. pred. ages	visual plot inspection of obs. vs. pred. ages	visual plot inspection of obs. vs. pred. ages	visual plot inspection of obs. vs. pred. ages	visual plot inspection of obs. vs. pred. ages	visual plot inspection of obs. vs. pred. ages	visual plot inspection of obs. vs. pred. ages
Model used for interpretation	Expected				Expected				Expected	Expected	Expected	Expected/Maximum Likelihood/Maximum Posterior presented	Expected	Expected	Expected	Expected	Expected	Expected	Expected	Expected	Expected
Comments	-				-				-	-	-	-	-	-	-	-	-	-	-	-	-

## Sheet: Sheet2
AFT Data	Zeta = 316.7
Sample	Long.	Lat.	Elev.	ρs	Ns	ρi	Ni	ρd	Nd	P(χ2)	Dpar	[U]	C. AFT Age	±1σ	Disp. (%)	#Xtls	Measured			c-axis correction			#HCT
	(°)	(°)	(m)	(106cm-2)		(106cm-2)		(106cm-2)			(μm)	(ppm)	(Ma)				MTL (μm)	±1σ	SD	MTL (μm)	±1σ	SD
NQ12-09	17.7709	-30.3447	355	12.611	1153	31.785	2906	17.1	16086	0.4866	2.489	25.76	106.6	3.8	0.1523	20	13.6	0.191	1.92	14.74	0.20701	1.2	101
Apatite (U-Th)/He data
Sample	4He	238U		235U		232Th		147Sm		eUa	Tb	Lc	Wc	R*d	Fte	Raw Age	±Est. UCf	Cor. Ageg	±Est. UCf	Raw Age (Ma)		Cor. Age (Ma)
	(cc)	(ng)	(ppm)	(ng)	(ppm)	(ng)	(ppm)	(ng)	(ppm)	(ppm)		(μm)	(μm)	(μm)		(Ma)		(Ma)		Average	St. Dev	Average	St. Dev
NQ12-09-1	1.17001e-09	0.0430458	32.1541	0.000312198	0.233203	0.393274	293.765	0.0937776	70.0494	101.422	2	146.3	60.34	37.518	0.572674	70.2607	7.88941	122.689	13.7764
NQ12-09-2	1.89237e-09	0.0611385	20.9762	0.000443418	0.152134	0.626913	215.09	0.105903	36.3345	71.6744	2	177.37	80.86	49.3875	0.674268	73.9474	8.31877	109.671	12.3375
NQ12-09-6	5.13554e-09	0.104609	16.9705	0.000758698	0.123082	0.88925	144.261	0.190051	30.8315	50.995	2	158.87	124.25	66.9911	0.761212	132.918	14.9121	174.613	19.5899
NQ12-09-16	4.15363e-09	0.103862	20.1839	0.000753278	0.146388	0.882898	171.577	0.202772	39.4055	60.651	2	206.89	99.48	60.1491	0.73405	108.365	12.1575	147.626	16.5622
